# Supplementary material for: Improving transitions from acute care to home among complex older adults using the LACE Index and care coordination
Source: PubMed Central journal article supplement — BMJ Open Qual. 2020 Jun 21;9(2):e000814. doi: 10.1136/bmjoq-2019-000814 (PMC7311032; doi:10.1136/bmjoq-2019-000814), 2020-06-21
Supplement: bmjoq-2019-000814supp001.pdf [file bmjoq-2019-000814supp001.pdf]

Appendix 1: The LACE index



**Covenant Health**  
Compassionate care for the Catholic world

Patient Label

### Patient Risk Assessment Tool-LACE

| ATTRIBUTE                                                         | VALUE                         | POINTS**                                                                                                          |
|-------------------------------------------------------------------|-------------------------------|-------------------------------------------------------------------------------------------------------------------|
| Length of Stay ("L")-Number of days admitted to hospital          | <1                            | 0                                                                                                                 |
|                                                                   | 1                             | 1                                                                                                                 |
|                                                                   | 2                             | 2                                                                                                                 |
|                                                                   | 3                             | 3                                                                                                                 |
|                                                                   | 4-6                           | 4                                                                                                                 |
|                                                                   | 7-13                          | 5                                                                                                                 |
|                                                                   | ≥14                           | 7                                                                                                                 |
| Acute (emergent) admission ("A")                                  | Yes                           | 3                                                                                                                 |
| Comorbidity (Charlson comorbidity index score) ("C")<br>Condition | Score (circle as appropriate) | If the TOTAL score is between 0 and 3 enter the score into Box C. If the score is 4 or higher, enter 5 into Box C |
| Previous myocardial infarction                                    | +1                            |                                                                                                                   |
| Cerebrovascular disease                                           | +1                            |                                                                                                                   |
| Peripheral vascular disease                                       | +1                            |                                                                                                                   |
| Diabetes without complications                                    | +1                            |                                                                                                                   |
| Congestive heart failure                                          | +2                            |                                                                                                                   |
| Diabetes with end organ damage                                    | +2                            |                                                                                                                   |
| Chronic pulmonary disease                                         | +2                            |                                                                                                                   |
| Mild liver or renal disease                                       | +2                            |                                                                                                                   |
| Any tumor (including lymphoma or leukemia)                        | +2                            |                                                                                                                   |
| Dementia                                                          | +3                            |                                                                                                                   |
| Connective tissue disease                                         | +3                            |                                                                                                                   |
| AIDS                                                              | +4                            |                                                                                                                   |
| Moderate or severe liver or renal disease                         | +4                            |                                                                                                                   |
| Metastatic solid tumor                                            | +5                            |                                                                                                                   |
|                                                                   |                               |                                                                                                                   |
| ATTRIBUTE                                                         | VALUE                         | POINTS**                                                                                                          |
| ED Visits during previous 6 months ("E")                          | 0                             | 0                                                                                                                 |
|                                                                   | 1                             | 1                                                                                                                 |
|                                                                   | 2                             | 2                                                                                                                 |
|                                                                   | 3                             | 3                                                                                                                 |
|                                                                   | ≥4                            | 4                                                                                                                 |

**HIGH RISK**  
Day 3 – greater or equal to 10  
Complete LACE – greater or equal to 13

\*\*Total (4 boxes) =

\*\*If 13 or more, complete Patient Appointment sheet\*\*
