# Supplementary material for: Improving transitions from acute care to home among complex older adults using the LACE Index and care coordination
Source: PubMed Central journal article supplement — BMJ Open Qual. 2020 Jun 21;9(2):e000814. doi: 10.1136/bmjoq-2019-000814 (PMC7311032; doi:10.1136/bmjoq-2019-000814), 2020-06-21
Supplement: bmjoq-2019-000814supp002.pdf [file bmjoq-2019-000814supp002.pdf]

## Appendix 2: Follow-Up Phone Call Script

|  Covenant Health   INTEGRATED ACCESS                                                                                                                                                                                                                                                                                                                                                                                                                                                                                                                                                                                                                                                                                                                                                                                                                                                                                                                                       |                      |                                                                                                                                                                          |                                                                                                                                                                          |                                                                                                                                                                          |
|---------------------------------------------------------------------------------------------------------------------------------------------------------------------------------------------------------------------------------------------------------------------------------------------------------------------------------------------------------------------------------------------------------------------------------------------------------------------------------------------------------------------------------------------------------------------------------------------------------------------------------------------------------------------------------------------------------------------------------------------------------------------------------------------------------------------------------------------------------------------------------------------------------------------------------------------------------------------------------------------------------------------------------------------------------------|----------------------|--------------------------------------------------------------------------------------------------------------------------------------------------------------------------|--------------------------------------------------------------------------------------------------------------------------------------------------------------------------|--------------------------------------------------------------------------------------------------------------------------------------------------------------------------|
| <b>POST DISCHARGE PHONE CALL DOCUMENTATION</b>                                                                                                                                                                                                                                                                                                                                                                                                                                                                                                                                                                                                                                                                                                                                                                                                                                                                                                                                                                                                                |                      |                                                                                                                                                                          |                                                                                                                                                                          |                                                                                                                                                                          |
| <u>FILL OUT PRIOR TO DISCHARGE</u><br>Date of Discharge: _____ Admitting diagnosis: _____<br>Contact person: _____ Phone number: _____<br>LACE Score: _____<br>Home Care Patient <input type="checkbox"/> N/A <input type="checkbox"/> YES <input type="checkbox"/> NO <input type="checkbox"/> NEW <input type="checkbox"/> EXISTING<br>System Case Manager Involved: <input type="checkbox"/> YES <input type="checkbox"/> NO<br>Primary Care Network Patient: <input type="checkbox"/> YES <input type="checkbox"/> NO<br>Discharge to: <input type="checkbox"/> HOME <input type="checkbox"/> LODGE <input type="checkbox"/> SUPPORTIVE LIVING <input type="checkbox"/> OTHER _____<br>Were prescriptions faxed? <input type="checkbox"/> YES <input type="checkbox"/> NO<br>Was home care referral done? <input type="checkbox"/> YES <input type="checkbox"/> NO<br>Was PCP notification sent? <input type="checkbox"/> YES <input type="checkbox"/> NO    Appointment booked? _____ Date _____<br>Pre-discharge visit done:<br>_____<br>_____<br>_____ | <b>PATIENT LABEL</b> |                                                                                                                                                                          |                                                                                                                                                                          |                                                                                                                                                                          |
| <b>***Reminder for client - HOME CARE OR PRIMARY CARE NETWORK MAY BE CALLING ALSO**</b>                                                                                                                                                                                                                                                                                                                                                                                                                                                                                                                                                                                                                                                                                                                                                                                                                                                                                                                                                                       |                      |                                                                                                                                                                          |                                                                                                                                                                          |                                                                                                                                                                          |
| <u>PHONE CALL TIME ALLOCATION:</u>                                                                                                                                                                                                                                                                                                                                                                                                                                                                                                                                                                                                                                                                                                                                                                                                                                                                                                                                                                                                                            |                      |                                                                                                                                                                          |                                                                                                                                                                          |                                                                                                                                                                          |
| <table border="1" style="width: 100%; border-collapse: collapse;"> <tr> <td style="padding: 5px;">           1<sup>st</sup> call Date _____ Start time _____ End time _____ Spoke with _____<br/>           Message Left:    <input type="checkbox"/> YES    <input type="checkbox"/> NO<br/>           Why: _____         </td> </tr> <tr> <td style="padding: 5px;">           2<sup>nd</sup> call Date _____ Start time _____ End time _____ Spoke with _____<br/>           Message Left:    <input type="checkbox"/> YES    <input type="checkbox"/> NO<br/>           Why: _____         </td> </tr> <tr> <td style="padding: 5px;">           3<sup>rd</sup> call Date _____ Start time _____ End time _____ Spoke with _____<br/>           Message Left:    <input type="checkbox"/> YES    <input type="checkbox"/> NO<br/>           Why: _____         </td> </tr> </table>                                                                                                                                                                       |                      | 1 <sup>st</sup> call Date _____ Start time _____ End time _____ Spoke with _____<br>Message Left: <input type="checkbox"/> YES <input type="checkbox"/> NO<br>Why: _____ | 2 <sup>nd</sup> call Date _____ Start time _____ End time _____ Spoke with _____<br>Message Left: <input type="checkbox"/> YES <input type="checkbox"/> NO<br>Why: _____ | 3 <sup>rd</sup> call Date _____ Start time _____ End time _____ Spoke with _____<br>Message Left: <input type="checkbox"/> YES <input type="checkbox"/> NO<br>Why: _____ |
| 1 <sup>st</sup> call Date _____ Start time _____ End time _____ Spoke with _____<br>Message Left: <input type="checkbox"/> YES <input type="checkbox"/> NO<br>Why: _____                                                                                                                                                                                                                                                                                                                                                                                                                                                                                                                                                                                                                                                                                                                                                                                                                                                                                      |                      |                                                                                                                                                                          |                                                                                                                                                                          |                                                                                                                                                                          |
| 2 <sup>nd</sup> call Date _____ Start time _____ End time _____ Spoke with _____<br>Message Left: <input type="checkbox"/> YES <input type="checkbox"/> NO<br>Why: _____                                                                                                                                                                                                                                                                                                                                                                                                                                                                                                                                                                                                                                                                                                                                                                                                                                                                                      |                      |                                                                                                                                                                          |                                                                                                                                                                          |                                                                                                                                                                          |
| 3 <sup>rd</sup> call Date _____ Start time _____ End time _____ Spoke with _____<br>Message Left: <input type="checkbox"/> YES <input type="checkbox"/> NO<br>Why: _____                                                                                                                                                                                                                                                                                                                                                                                                                                                                                                                                                                                                                                                                                                                                                                                                                                                                                      |                      |                                                                                                                                                                          |                                                                                                                                                                          |                                                                                                                                                                          |
| Transitions in Care Pilot Project - Post Discharge Phone Call Questionnaire                                                                                                                                                                                                                                                                                                                                                                                                                                                                                                                                                                                                                                                                                                                                                                                                                                                                                                                                                                                   | Page 1               |                                                                                                                                                                          |                                                                                                                                                                          |                                                                                                                                                                          |

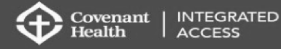

Patient/Caregiver has given consent to call  YES  NO

**QUESTIONS:**

| <u>Question(s)</u>                                                                                 | <u>Patients/ Caregiver Answer(s)</u>                                                                                                                                           | <u>Intervention(s)/ Recommendation(s) Including Time Spent Off the Phone</u> |
|----------------------------------------------------------------------------------------------------|--------------------------------------------------------------------------------------------------------------------------------------------------------------------------------|------------------------------------------------------------------------------|
| Do you have any questions about your discharge instructions?                                       | <input type="checkbox"/> Yes <input type="checkbox"/> No                                                                                                                       |                                                                              |
| Patient seems to understand discharge instructions?                                                | <input type="checkbox"/> Yes <input type="checkbox"/> No                                                                                                                       |                                                                              |
| Did you pick up your prescriptions?                                                                | <input type="checkbox"/> Yes <input type="checkbox"/> No                                                                                                                       |                                                                              |
| Do you have any questions about your medications?                                                  | <input type="checkbox"/> Yes <input type="checkbox"/> No                                                                                                                       |                                                                              |
| Are you taking them as prescribed?                                                                 | <input type="checkbox"/> Yes <input type="checkbox"/> No                                                                                                                       |                                                                              |
| Did home care contact you?<br>Visit you?                                                           | <input type="checkbox"/> Yes <input type="checkbox"/> No <input type="checkbox"/> N/A<br><input type="checkbox"/> Yes <input type="checkbox"/> No <input type="checkbox"/> N/A | Initial Assessment Date: _____<br>Services Initiated: _____                  |
| Have you made arrangements to attend your family doctor appointment/other specialist appointments? | <input type="checkbox"/> Yes <input type="checkbox"/> No                                                                                                                       |                                                                              |

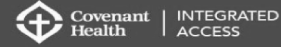

|                                                                                           |                                                                                       |  |
|-------------------------------------------------------------------------------------------|---------------------------------------------------------------------------------------|--|
| Do you have transportation to the appointment(s)?<br>(provide resources if required)      | <input type="checkbox"/> Yes <input type="checkbox"/> No                              |  |
| Did you or your family pick up equipment ordered by the hospital?                         | <input type="checkbox"/> N/A <input type="checkbox"/> Yes <input type="checkbox"/> No |  |
| Have you been able to get your meals?<br>(provide resources if requested)                 | <input type="checkbox"/> Yes <input type="checkbox"/> No                              |  |
| Is there anything we could have done to better prepare your discharge home?               | <input type="checkbox"/> Yes <input type="checkbox"/> No                              |  |
| Were there any difficulties with your discharge? If so, what would have made it smoother? | <input type="checkbox"/> Yes <input type="checkbox"/> No                              |  |
| Was this phone call helpful?                                                              | <input type="checkbox"/> Yes <input type="checkbox"/> No                              |  |

| <u>Other Patient Concerns</u> | <u>Intervention(s)/ Recommendation(s)</u> |
|-------------------------------|-------------------------------------------|
|                               |                                           |

Total Time Spent on Phone Calls: \_\_\_\_\_

Total Time Spent on Non Phone Call Tasks: \_\_\_\_\_

Faxed to PCP and / or Case Manager  Yes  No

Questionnaire complete by \_\_\_\_\_
